# Supplementary material for: Can nanoparticle toughen fiber-reinforced thermosetting polymers?
Source: Springer Nature journal article supplement (doi:10.1007/s10853-018-03195-9), 2018-12-06
Supplement: MOESM1 [file 16322302]

**Supplemental Information**

**Can Nanoparticle Toughen Fiber-reinforced Thermosetting Polymers?**

Kunwei Liua, Christopher W. Macoskoa, *

a *Department of Chemical Engineering & Materials Science, University of Minnesota, 421 Washington Ave. SE, Minneapolis, MN 55455, USA*

***Corresponding Author: macosko@umn.edu

**Table S1.** References of rubber toughened resin and their corresponding FRPs.

| **Reference** | GIC_Resin  (J/m2) | Initiation GIC_Comp  (J/m2) | Propagation GIC_Comp  (J/m2) | IR | IC | Materials | Toughener Content (wt%) | Fiber Type | Fiber Architecture | Fiber Vol (%) |
| --- | --- | --- | --- | --- | --- | --- | --- | --- | --- | --- |
| Ngah [1] | 81 | 328 | 819 | - | - | Neat Epoxy | - | G | Mutiaxial | - |
| 155 | 429 | 1059 | 1.91 | 1.31 | CSR | 2 | G | Mutiaxial | - |
| 279 | 455 | 1012 | 3.44 | 1.39 | CSR | 5 | G | Mutiaxial | - |
| 524 | 651 | 1054 | 6.47 | 1.98 | CSR | 10 | G | Mutiaxial | - |
| 844 | 829 | 1475 | 10.4 | 2.53 | CSR | 15 | G | Mutiaxial | - |
| 178 | 398 | 798 | 2.19 | 1.21 | CSR | 2 | G | Mutiaxial | - |
| 315 | 543 | 1049 | 3.89 | 1.66 | CSR | 5 | G | Mutiaxial | - |
| 502 | 626 | 1045 | 6.23 | 1.91 | CSR | 10 | G | Mutiaxial | - |
| 641 | 842 | 961 | 7.95 | 2.57 | CSR | 15 | G | Mutiaxial | - |
| Yan [2] | 167 | 221 | - | - | - | Neat Epoxy | - | C | UD | - |
| 797 | 529 | - | 4.77 | 2.39 | CTBN | 15 | C | UD | - |
| 3140 | 320 | - | 18.8 | 1.45 | CSR | 15 | C | UD | - |
| Kinloch [3] | 103 | 439 | - | - | - | Neat Epoxy | - | C | Woven | 26.5 |
| 443 | 1050 | - | 4.30 | 2.39 | CTBN | 9 | C | Woven | 26.5 |
| Kinloch [4] | 83 | 710 | - | - | - | Neat Epoxy (Anhydride) | - | G | Biaxial | 57 |
| 415 | 1032 | - | 5 | 1.45 | CTBN | 9 | G | Biaxial | 57 |
| 70 | 450 | - | - | - | Neat Epoxy (Amine) | - | C | Biaxial | 57 |
| 557 | 566 | - | 7.96 | 1.26 | CTBN | 9 | C | Biaxial | 57 |
| Zeng [5] | 277 | 500 | - | - | - | Neat Epoxy | - | C | Woven | 60 |
| 604 | 878 | - | 2.18 | 1.76 | CSR | 4 | C | Woven | 60 |
| 946 | 1104 | - | 3.42 | 2.21 | CSR | 6 | C | Woven | 60 |
| 1340 | 1145 | - | 4.84 | 2.29 | CSR | 8 | C | Woven | 60 |
| 1930 | 1283 | - | 6.97 | 2.57 | CSR | 10 | C | Woven | 60 |
| 2380 | 1091 | - | 8.59 | 2.18 | CSR | 12 | C | Woven | 60 |
| Hsieh [6] | 77 | 439 | - | - | - | Neat Epoxy (CFRP) | - | C | Woven | 27 |
| 671 | 1044 | - | 8.71 | 2.38 | CTBN | 9 | C | Woven | 27 |
| 77 | 330 | - |  |  | Neat Epoxy (UD) | - | G | UD | 59 |
| 671 | 885 | - | 8.71 | 2.68 | CTBN | 9 | G | UD | 59 |
| 77 | 718 | - |  |  | Neat Epoxy(QI) | - | G | Biaxial | 57 |
| 671 | 1035 | - | 8.71 | 1.44 | CTBN | 9 | G | Biaxial | 57 |
| Carolan [7] | 173 | 189 | 1246 | - | - | Neat Epoxy | - | C | Biaxial | - |
| 507 | 482 | 1538 | 2.93 | 2.56 | CSR | 4 | C | Biaxial | - |
| 931 | 753 | 1680 | 5.38 | 3.98 | CSR | 8 | C | Biaxial | - |
| Compston [8] | 164 | 147 | 648 | - | - | Neat VER | - | G | UD | 40 |
| 1348 | 631 | 1714 | 8.20 | 4.29 | CSR | 4.68 | G | UD | 40 |
| 748 | 775 | 1140 | - | - | Elastomer-modified VER | - | G | UD | 40 |
| 1668 | 803 | 1803 | 2.23 | 1.03 | VTBN | 6.85 | G | UD | 40 |
| 1892 | 939 | 2170 | 2.53 | 1.21 | CTBN | 6.85 | G | UD | 40 |
| Liu [9] | 100 | 374 | 586 | - | - | Neat UPR | - | G | Woven | 20 |
| 380 | 421 | 524 | 3.78 | 1.10 | CSR | 5 | G | Woven | 20 |
| 170 | 526 | 752 | - | - | Neat VER | - | G | Woven | 20 |
| 1204 | 788 | 998 | 7.08 | 1.50 | CSR | 5 | G | Woven | 20 |
| Klingler [10] | 250 | - | 630 | - | - | Neat UPR | - |  | Random | - |
| 410 | - | 750 | 1.64 | 1.19 | CSR | 2 | G | Random | - |

**Table S2.** References of nanosilica-toughened epoxy resin and their corresponding FRPs.

| **Reference** | GIC_Resin  **(J/m2)** | Initiation GIC_Comp  **(J/m2)** | Propagation GIC_Comp  **(J/m2)** | ***IR*** | ***IC*** | **Materials** | **Toughener Content (wt%)** | **Fiber Type** | **Fiber Architecture** | **Fiber Vol (%)** |
| --- | --- | --- | --- | --- | --- | --- | --- | --- | --- | --- |
| Ngah [1] | 81 | 328 | 819 | - | - | Neat Epoxy | - | G | Mutiaxial | - |
| 106 | 285 | 514 | 1.32 | 0.87 | Nanosilica | 2 | G | Mutiaxial | - |
| 131 | 297 | 626 | 1.62 | 0.91 | Nanosilica | 5 | G | Mutiaxial | - |
| 193 | 449 | 849 | 2.40 | 1.37 | Nanosilica | 10 | G | Mutiaxial | - |
| 182 | 499 | 810 | 2.26 | 1.52 | Nanosilica | 15 | G | Mutiaxial | - |
| Kinloch [3] | 103 | 439 | - | - | - | Neat Epoxy | - | C | Woven | 26.5 |
| 363 | 489 | - | 3.52 | 1.11 | Nanosilica | 11.9 | C | Woven | 26.5 |
| Zeng [5] | 277 | 500 | - | - | - | Neat Epoxy | - | C | Woven | 60 |
| 390 | 636 | - | 1.41 | 1.27 | Nanosilica | 4 | C | Woven | 60 |
| 465 | 657 | - | 1.68 | 1.31 | Nanosilica | 6 | C | Woven | 60 |
| 546 | 643 | - | 1.97 | 1.29 | Nanosilica | 8 | C | Woven | 60 |
| 690 | 629 | - | 2.49 | 1.26 | Nanosilica | 10 | C | Woven | 60 |
| 791 | 621 | - | 2.86 | 1.24 | Nanosilica | 12 | C | Woven | 60 |
| Kinloch [4] | 83 | 710 | - | - | - | Neat Epoxy (Anhydride) | - | G | Biaxial | 57 |
| 125 | 610 | - | 1.51 | 0.86 | Nanosilica | 10 | G | Biaxial | 57 |
| 70 | 450 | - | - | - | Neat Epoxy (Amine Cured) | - | C | Biaxial | 57 |
| 112 | 225 | - | 1.60 | 0.50 | Nanosilica | 10 | C | Biaxial | 57 |
| Wichmann & Gojny [11, 12, 13] | 137 | - | 800 | - | - | Neat Epoxy (37 vol% fiber) | - | G | Biaxial | 37 |
| 454 | - | 900 | 3.31 | 1.13 | Fumed Silica | 0.5 vol% | G | Biaxial | 37 |
| Deng [14] | 238 | 610 | 900 | - | - | Neat Epoxy | - | C | UD | 43 |
| 349 | 1010 | 1390 | 1.47 | 1.66 | Nanosilica | 4 | C | UD | 43 |
| Tsai [15] | 190 | 830 | - | - | - | - | - | G | UD | - |
| 280 | 900 | - | 1.47 | 1.08 | Nanosilica | 10 | G | UD | - |
| 350 | 950 | - | 1.84 | 1.14 | Nanosilica | 20 | G | UD | - |
| Hsieh [6] | 77 | 439 | - | - | - | Neat Epoxy (CFRP) | - | C | Woven | 27 |
| 183 | 489 | - | 2.38 | 1.11 | Nanosilica | 12 | C | Woven | 27 |
| 77 | 330 | - |  |  | Neat Epoxy (UD) | - | G | UD | 59 |
| 183 | 1015 | - | 2.38 | 3.08 | Nanosilica | 10 | G | UD | 59 |
| 77 | 718 | - |  |  | Neat Epoxy(QI) | - | G | Biaxial | 57 |
| 183 | 626 | - | 2.38 | 0.87 | Nanosilica | 10 | G | Biaxial | 57 |
| Tang [16] | 238 | 417 | 995 | - | - | Nanosilica | - | C | UD | 65 |
| 458 | 511 | 1007 | 1.92 | 1.23 | Nanosilica | 10 | C | UD | 65 |
| 666 | 729 | 1203 | 2.80 | 1.70 | Nanosilica | 20 | C | UD | 65 |
| Carolan [7] | 173 | 189 | 1246 | - | - | Neat Epoxy | - | C | Biaxial | - |
| 188 | 189 | 1170 | 1.09 | 0.94 | Nanosilica | 4 | C | Biaxial | - |
| 200 | 217 | 1311 | 1.16 | 1 | Nanosilica | 8 | C | Biaxial | - |

**Table S3.** References of silica-rubber hybrid-toughened epoxy resin and their corresponding FRPs.

| **Reference** | GIC_Resin  (J/m2) | Initiation GIC_Comp  (J/m2) | Propagation GIC_Comp  (J/m2) | IR | IC | Materials | Toughener Content (wt%) | Fiber Type | Fiber Architecture | Fiber Vol (%) |
| --- | --- | --- | --- | --- | --- | --- | --- | --- | --- | --- |
| Kinloch [3] | 103 | 439 | - | - | - | Neat Epoxy | - | C | Woven | 26.5 |
| 363 | 489 | - | 3.52 | 1.11 | Nanosilica | 11.9 | C | Woven | 26.5 |
| 443 | 1050 | - | 4.30 | 2.39 | CTBN | 9 | C | Woven | 26.5 |
| 964 | 1260 | - | 9.36 | 2.87 | Nanosilica/ CTBN | 2.3/9 | C | Woven | 26.5 |
| 917 | 1080 | - | 8.90 | 2.46 | Nanosilica/ CTBN | 4.7/9 | C | Woven | 26.5 |
| 1240 | 1320 | - | 12.04 | 3.01 | Nanosilica/ CTBN | 10.5/9 | C | Woven | 26.5 |
| Zeng [5] | 277 | - | 500 | - | - | Neat Epoxy | - | C | Woven | 60 |
| 390 | - | 636 | 1.41 | 1.27 | Nanosilica | 4 | C | Woven | 60 |
| 465 | - | 657 | 1.68 | 1.31 | Nanosilica | 6 | C | Woven | 60 |
| 546 | - | 643 | 1.97 | 1.29 | Nanosilica | 8 | C | Woven | 60 |
| 690 | - | 629 | 2.49 | 1.26 | Nanosilica | 10 | C | Woven | 60 |
| 791 | - | 621 | 2.86 | 1.24 | Nanosilica | 12 | C | Woven | 60 |
| 604 | - | 878 | 2.18 | 1.76 | CSR | 4 | C | Woven | 60 |
| 946 | - | 1104 | 3.42 | 2.21 | CSR | 6 | C | Woven | 60 |
| 1340 | - | 1145 | 4.84 | 2.29 | CSR | 8 | C | Woven | 60 |
| 1930 | - | 1283 | 6.97 | 2.57 | CSR | 10 | C | Woven | 60 |
| 2380 | - | 1091 | 8.59 | 2.18 | CSR | 12 | C | Woven | 60 |
| - | - | 1020 | - | 2.04 | Nanosilica/CSR | 4/4 | C | Woven | 60 |
| - | - | 1040 | - | 2.08 | Nanosilica/CSR | 6/6 | C | Woven | 60 |
| Kinloch [4] | 83 | 710 | - | - | - | Neat Epoxy (Anhydride) | - | G | Biaxial | 57 |
| 125 | 610 | - | 1.51 | 0.86 | Nanosilica | 10 | G | Biaxial | 57 |
| 415 | 1032 | - | 5 | 1.45 | CTBN | 9 |  |  | 57 |
| 610 | 1250 | - | 7.35 | 1.76 | Nanosilica/CTBN | 10/9 | G | Biaxial | 57 |
| 70 | 450 | - | - | - | Neat Epoxy (Amine Cured) | - | C | Biaxial | 57 |
| 112 | 225 | - | 1.60 | 0.50 | Nanosilica | 10 | C | Biaxial | 57 |
| 557 | 566 | - | 7.96 | 1.26 | CTBN | 9 |  |  | 57 |
| 575 | 700 | - | 8.21 | 1.56 | Nanosilica/CTBN | 10/9 | C | Biaxial | 57 |
| Tsai [15] | 190 | 830 | - | - | - | - | - | G | UD | - |
| 280 | 900 | - | 1.47 | 1.08 | Nanosilica | 10 | G | UD | - |
| 350 | 950 | - | 1.84 | 1.14 | Nanosilica | 20 | G | UD | - |
| 1170 | 1010 | - | 6.16 | 1.22 | CTBN | 10 | G | UD | - |
| 1420 | 1660 | - | 7.47 | 2.00 | CSR | 10 | G | UD | - |
| 930 | 1230 | - | 4.89 | 1.48 | Nanosilica/CTBN | 10/10 | G | UD | - |
| 1030 | 1510 | - | 5.42 | 1.82 | Nanosilica/ CSR | 10/10 | G | UD | - |
| Hsieh [6] | 77 | 439 | - | - | - | Neat Epoxy (CFRP) | - | C | Woven | 27 |
| 183 | 489 | - | 2.38 | 1.11 | Nanosilica | 12 | C | Woven | 27 |
| 671 | 1044 | - | 8.71 | 2.38 | CTBN | 9 | C | Woven | 27 |
| 720 | 1261 | - | 9.35 | 2.87 | Nanosilica/CTBN | 2.3/9 | C | Woven | 27 |
| 906 | 1316 | - | 11.77 | 3.00 | Nanosilica/CTBN | 10/9 | C | Woven | 27 |
| 77 | 330 | - |  |  | Neat Epoxy (UD) | - | G | UD | 59 |
| 183 | 1015 | - | 2.38 | 3.08 | Nanosilica | 10 | G | UD | 59 |
| 671 | 885 | - | 8.71 | 2.68 | CTBN | 9 | G | UD | 59 |
| 906 | 860 | - | 11.77 | 2.61 | Nanosilica/CTBN | 10/9 | G | UD | 59 |
| 77 | 718 | - |  |  | Neat Epoxy(QI) | - | G | Biaxial | 57 |
| 183 | 626 | - | 2.38 | 0.87 | Nanosilica | 10 | G | Biaxial | 57 |
| 671 | 1035 | - | 8.71 | 1.44 | CTBN | 9 | G | Biaxial | 57 |
| 906 | 1263 | - | 11.77 | 1.76 | Nanosilica/CTBN | 10/9 | G | Biaxial | 57 |
| Sprenger [17] | 126 | 433 | - | - | - | Neat Epoxy | - | C | Biaxial | 54 |
| 406 | 688 | - | 3.22 | 1.59 | CTBN | 10 | C | Biaxial | 54 |
| 364 | 613 | - | 2.89 | 1.42 | Nanosilica/CTBN | 5/10 | C | Biaxial | 54 |
| 383 | 555 | - | 3.04 | 1.28 | Nanosilica/CTBN | 7.5/10 | C | Biaxial | 54 |
| 447 | 621 | - | 3.55 | 1.43 | Nanosilica/CTBN | 10/10 | C | Biaxial | 54 |
| Carolan [7] | 173 | 189 | 1246 | - | - | Neat Epoxy | - | C | Biaxial | - |
| 507 | 482 | 1538 | 2.93 | 2.56 | CSR | 4 | C | Biaxial | - |
| 931 | 753 | 1680 | 5.38 | 3.98 | CSR | 8 | C | Biaxial | - |
| 188 | 189 | 1170 | 1.09 | 0.94 | Nanosilica | 4 | C | Biaxial | - |
| 200 | 217 | 1311 | 1.16 | 1 | Nanosilica | 8 | C | Biaxial | - |
| 628 | 380 | 1624 | 3.63 | 1.15 | Nanosilica/CSR | 4/4 | C | Biaxial | - |
| 1056 | 547 | 1851 | 6.10 | 2.89 | Nanosilica/CSR | 4/8 | C | Biaxial | - |
| 724 | 385 | 1523 | 4.18 | 2.04 | Nanosilica/CSR | 8/4 | C | Biaxial | - |
| 1217 | 560 | 1761 | 7.03 | 2.96 | Nanosilica/CSR | 8/8 | C | Biaxial | - |

**Table S4.** References of carbon nanoparticles-toughened epoxy and polyester resin and their corresponding FRPs.

| **Reference** | GIC_Resin  (J/m2) | Initiation GIC_Comp  (J/m2) | Propagation GIC_Comp  (J/m2) | IR | IC | Materials | Toughener Content (wt%) | Fiber Type | Fiber Architecture | Fiber Vol (%) |
| --- | --- | --- | --- | --- | --- | --- | --- | --- | --- | --- |
| Wichmann & Gojny [11, 12, 13] | 137 | 460 | - | - | - | Neat Epoxy | - | G | Biaxial | 37 |
| 210 | 385 | - | 1.53 | 0.84 | DWCNT | 0.3 | G | Biaxial | 37 |
| 242 | 415 | - | 1.77 | 0.90 | DWCNT-NH2 | 0.3 | G | Biaxial | 37 |
| 194 | 375 | - | 1.42 | 0.82 | MWCNT-NH2 | 0.3 | G | Biaxial | 37 |
| Kermansaravi [18] | 300 | - | 1063 | - | - | Neat Epoxy | - | G | Woven | 29 |
| 350 | - | 1320 | 1.17 | 1.24 | MWCNT-COOH | 0.5 | G | Woven | 29 |
| 290 | - | 1306 | 0.97 | 1.23 | MWCNT-COOH | 1 | G | Woven | 29 |
| Seyhan [19, 20] | 106 | 620 | - | - | - | Neat VER | - | G | Biaxial | - |
| 115 | 480 | - | 1.08 | 0.77 | MWCNT-NH2 | 0.1 | G | Biaxial | - |
| Liu [9] | 100 | 374 | 586 | - | - | Neat UPR | - | G | Woven | 20 |
| 149 | 339 | 566 | 1.49 | 0.91 | Alkyl-GO | 0.04 | G | Woven | 20 |
| 115 | 340 | 591 | 1.14 | 0.91 | Vinyl-GO | 0.04 | G | Woven | 20 |
| 170 | 526 | 752 | - | - | Neat VER | - | G | Woven | 20 |
| 229 | 788 | 998 | 1.35 | 0.99 | Alkyl-GO | 0.04 | G | Woven | 20 |

**Table S5.** References of carbon nanoparticles-toughened epoxy FRPs. In these references, the improvement of resin fracture toughness was not reported.

| **Reference** | Initiation GIC_Comp  (J/m2) | Propagation GIC_Comp  (J/m2) | IC | Materials | Toughener Content (wt%) | Fiber  Type | Fiber Architecture | Fiber Vol (%) |
| --- | --- | --- | --- | --- | --- | --- | --- | --- |
| Yokozeki [21] | 86 | - | - | Neat Epoxy | - | C | UD | 19 |
| 170 | - | 1.98 | Cup-stacked Carbon Nanotubes | 5 | C | UD | 19 |
| Karapappas [22] | 300 | - | - | Neat Epoxy | - | C | UD | 56 |
| 270 | - | 0.90 | MWCNT | 0.1 | C | UD | 56 |
| 420 | - | 1.40 | MWCNT | 0.5 | C | UD | 56 |
| 480 | - | 1.60 | MWCNT | 1 | C | UD | 56 |
| Mirjalili [23] | 171 | 424 | - | Neat Epoxy | - | C | Woven | - |
| 228 | 630 | 1.33 | MWCNT | 0.3 | C | Woven | - |
| 418 | 876 | 2.44 | MWCNT + Toughners | 0.3 | C | Woven | - |
| Ashrafi [24] | 314 | 343 | - | Neat Epoxy | - | C | UD | - |
| 323 | 387 | 1.03 | SWCNT | 0.1 | C | UD | - |
| Borowski [25] | - | 943 | - | Neat Epoxy | - | C | UD | 58 |
| - | 1175 | 1.25 | MWCNT | 0.5 | C | UD | 50 |
| - | 1132 | 1.20 | MWCNT | 1 | C | UD | 51 |
| - | 1102 | 1.17 | MWCNT | 1.5 | C | UD | 49 |
| Godara [26] | 518 | 390 | - | Neat Epoxy | - | C | UD | 57 |
| 623 | 456 | 1.17 | MWCNT | 0.5 | C | UD | 60 |
| 744 | 488 | 1.25 | Thin MWCNT | 0.5 | C | UD | 61 |
| 689 | 519 | 1.33 | DWCNT | 0.5 | C | UD | 56 |
| 944 | 683 | 1.75 | Modified MWCNT | 0.5 | C | UD | 55 |
| Menbari [27] | 197 | 210 | - | Neat Epoxy | - | G | Woven | - |
| 250 | 254 | 1.27 | GO | 0.5 | G | Woven | - |
| 288 | 355 | 1.46 | Modified GO | 0.5 | G | Woven | - |
| 344 | 356 | 1.75 | Modified GO | 0.5 | G | Woven | - |
| 410 | 404 | 2.08 | Modified GO | 0.5 | G | Woven | - |
| Hawkins [28] | 137 | - | - | Neat Epoxy | - | C | UD | - |
| 149 | - | 1.08 | Graphene | 0.1 | C | UD | - |
| Ahmadi-Moghadam [29] | 339 | - | - | Neat Epoxy | - | G | UD | - |
| 379 | - | 1.12 | Graphene | 0.5 | G | UD | - |
| 378 | - | 1.12 | GO | 0.5 | G | UD | - |
| 454 | - | 1.34 | NH2 modified Graphene | 0.5 | G | UD | - |
| 476 | - | 1.40 | Silane Modified Graphene | 0.5 | G | UD | - |
| Arca [30] | 333 | 641 | - | Neat Epoxy | 3 | C | Biaxial | - |
| 473 | 952 | 1.42 | CNT | 3 | C | Biaxial | - |
| Romhany [31] | 920 | - |  | Neat Epoxy | - | C | UD | 49 |
| 952 | - | 1.03 | MWCNT | 0.1 | C | UD | 52 |
| 1043 | - | 1.13 | MWCNT | 0.3 | C | UD | 52 |
| 1005 | - | 1.09 | MWCNT | 0.5 | C | UD | 52 |
| 973 | - | 1.06 | MWCNT | 1 | C | UD | 53 |
| Inam [32] | - | - | - | Neat Epoxy | - | C | Biaxial | 57 |
| - | - | 0.77 | DWCNT-NH2 | 0.1 | C | Biaxial | 55 |

**Table S6.** References of nanoclay-toughened epoxy resin and their corresponding FRPs.

| **Reference** | GIC_Resin  (J/m2) | Initiation GIC_Comp  (J/m2) | Propagation GIC_Comp  (J/m2) | IR | IC | Materials | Toughener Content (wt%) | Fiber  Type | Fiber Architecture | Fiber Volume Fraction |
| --- | --- | --- | --- | --- | --- | --- | --- | --- | --- | --- |
| Becker [33] | 267 | 133 | - | - | - | Neat Epoxy | - | C | UD | 49 |
| 360 | 150 | - | 1.35 | 1.13 | Organoclay | 2.5 | C | UD | 49 |
| 480 | 160 | - | 1.80 | 1.20 | Organoclay | 5 | C | UD | 49 |
| 375 | 180 | - | 1.40 | 1.35 | Organoclay | 7.5 | C | UD | 49 |
| Siddiqui [34] | 144 | 320 | - | - | - | Neat Epoxy | - | C | Woven | 20 |
| 388 | 560 | - | 2.69 | 1.75 | Clay | 3 | C | Woven | 20 |
| 313 | 510 | - | 2.17 | 1.59 | Clay | 5 | C | Woven | 20 |
| 350 | 660 | - | 2.43 | 2.06 | Clay | 7 | C | Woven | 20 |
| Liu & Xu [35, 36] | 120 | 270 | - | - | - | Neat Epoxy | - | C | UD | 65 |
| 380 | 350 | - | 3.17 | 1.30 | Clay | 2 | C | UD | 62 |
| 530 | 390 | - | 4.42 | 1.44 | Clay | 4 | C | UD | 60 |
| Subramaniyan [37] | 2067 | - | 2292 | - | - | Neat Epoxy | - | G | UD | 37.5 |
| 1051 | - | 1364 | 0.51 | 0.60 | Clay | 5 | G | UD | 37.5 |
| Quaresimin [38] | - | 427 | - | - | - | Neat VER | - | C | UD | 65 |
| - | 133 | - | - | 0.31 | Clay | 5 | C | UD | 65 |
| - | 290 | - |  | 0.68 | Carbon Nanofiber | 7.5 | C | UD | 65 |
| - | 130 | - |  | 0.3 | Triblock Copolymer | 10 | C | UD | 65 |
| Phonthammachai [39] | - | - | 265 | - | - | Neat Epoxy | - | C | Woven | 70 |
| - | - | 320 | - | 1.21 | Silanized Clay | 0.6 | C | Woven | 70 |
| - | - | 180 | - | 0.68 | Silanized Clay | 1.5 | C | Woven | 70 |
| - | - | 155 | - | 0.58 | Silanized Clay | 3 | C | Woven | 70 |
| - | - | 230 | - | 0.87 | Clay | 0.6 | C | Woven | 70 |

**Table 7.** References related to FRPs toughening by fiber coating methods.

| **Reference** | Initiation GIC_Comp  (J/m2) | Propagation GIC_Comp  (J/m2) | IC | Materials | Method | Toughener Content (wt%) | Fiber  Type | Fiber Architecture |
| --- | --- | --- | --- | --- | --- | --- | --- | --- |
| Ning [40] | 162 | 445 |  | Neat Epoxy | Spread by Roller | 5 | C | UD |
|  | 226 | 754 | 1.40 | GO | 1 g/m^2 | C | UD |
|  | 437 | 859 | 2.70 | GO | 2 g/m^2 | C | UD |
|  | 412 | 827 | 2.54 | GO | 3 g/m^2 | C | UD |
| Ning [41] | 161 | 413 | - | Neat Epoxy | Spread by Roller | - | C | UD |
|  | 205 | 716 | 1.27 | CB | 10 g/m^2 | C | UD |
|  | 242 | 779 | 1.50 | CB | 15 g/m^2 | C | UD |
|  | 191 | 481 | 1.19 | CB | 20 g/m^2 | C | UD |
| Kamar [42] | - | 1018 | - | Neat Epoxy | Solvent-Brushed | - | G | Woven |
|  | - | 1373 | 1.35 | Graphene | 0.25 | G | Woven |
|  | - | 347 | 0.34 | Graphene | 1 | G | Woven |
| Li [43] | 221 | 489 | - | Neat Epoxy | Directly Applied |  | C | UD |
|  | 318 | 530 | 1.44 | VCGF | 10g/m2 | C | UD |
|  | 430 | 614 | 1.95 | VCGF | 20g/m2 | C | UD |
|  | 301 | 415 | 1.36 | VCGF | 30g/m2 | C | UD |
| Thakre [44] | 230.5 | - | - | Neat Epoxy | Solvent-Spray | 0.1 | C | Woven |
| 245.5 | - | 1.07 | SWCNT | 0.1 | C | Woven |
| 231.8 | - | 1.01 | Silane-SWCNT | 0.1 | C | Woven |
| Almuhammadi [45] | - | - | - | Neat Epoxy | Solvent-Spray | 0.5 | C | UD |
|  | - | - | 1.17 | COOH-MWCNT | 0.5 | C | UD |
| Joshi [46] | 547 | 750 | - | Neat Epoxy | Solvent-Spray | - | C | Woven |
|  | 778 | 990 | 1.42 | MWCNT | 1.32*10-6 g/mm2 | C | Woven |
|  | 595 | 653 | 1.09 | MWCNT | 2.25*10-6 g/mm2 | C | Woven |
|  | 439 | 435 | 0.80 | MWCNT | 3.62*10-6 g/mm2 | C | Woven |
| Shan [47] | - | 462 | - | MWCNT | Solvent-Spray | 0.5 | C | UD |
|  | - | 573 | 1.24 | MWCNT | 0.5 | C | UD |
| Gonzalez [48] | 715 | 611 | - | Neat Epoxy | Solvent-Spray | - | C | UD |
| 996 | 748 | 1.39 | MWCNT | - | C | UD |
| 1015 | 733 | 1.42 | Oxidized MWCNT | - | C | UD |
| 933 | 776 | 1.30 | MWCNT - dispersed | - | C | UD |
| 1093 | 671 | 1.53 | Oxidized MWCNT-dispersed | - | C | UD |
| Chaudhry [49] | - | - | - | Neat Epoxy | Solvent-Spray | - | C | Woven |
| - | - | 1.32 | MWCNT | 1.0 g/m2 | C | Woven |

**Reference**

1. Ngah SA, Taylor AC (2016), Compos Part A-Appl S, 80, 292-303

2. Yan C, Xiao KQ, Ye L, Mai YW (2002), J Mater Sci, 37, 921-927

3. Kinloch AJ, Mohammed RD, Taylor AC, Sprenger S, Egan D (2006), J Mater Sci, 41, 5043-5046

4. Kinloch A, Masania K, Taylor A, Sprenger S. The fracture of nanosilica and rubber toughened epoxy fibre composites. Proceedings of ICCM.

5. Zeng Y, Liu H-Y, Mai Y-W, Du X-S (2012), Composites Part B: Engineering, 43, 90-94

6. Hsieh TH, Kinloch AJ, Masania K, Lee JS, Taylor AC, Sprenger S (2010), J Mater Sci, 45, 1193-1210

7. Carolan D, Ivankovic A, Kinloch AJ, Sprenger S, Taylor AC (2017), J Mater Sci, 52, 1767-1788

8. Compston P, Jar PYB, Burchill PJ, Takahashi K (2002), Appl Compos Mater, 9, 291-314

9. Liu K, He S, Qian Y, An Q, Stein A, Macosko CW (2017), Polym Comp, doi:[10.1002/pc.25065](https://doi.org/10.1002/pc.25065)

10. Klingler A, Sorochynska L, Wetzel B. Toughening of Glass Fiber Reinforced Unsaturated Polyester Composites by Core-Shell Particles. Key Engineering Materials.

11. Gojny FH, Wichmann MHG, Fiedler B, Schulte K (2005), Compos Sci Technol, 65, 2300-2313

12. Wichmann MH, Sumfleth J, Gojny FH, Quaresimin M, Fiedler B, Schulte K (2006), Engineering Fracture Mechanics, 73, 2346-2359

13. Wichmann MHG, Cascione M, Fiedler B, Quaresimin M, Schulte K (2006), Composite Interfaces, 13, 699-715

14. Deng S, Rosso P, Ye L, Friedrich K (2007), Solid State Phenomen, 121-123, 1403-1406

15. Tsai JL, Huang BH, Cheng YL (2011), Procedia Engineer, 14,

16. Tang YH, Ye L, Zhang DH, Deng SQ (2011), Compos Part A-Appl S, 42, 1943-1950

17. Sprenger S, Kothmann MH, Altstaedt V (2014), Compos Sci Technol, 105, 86-95

18. Kermansaravi M, Pol MH (2016), Polym Composite,

19. Seyhan AT, Tanoglu M, Schulte K (2008), Engineering Fracture Mechanics, 75, 5151-5162

20. Seyhan AT, Tanoglu M, Schulte K (2009), Mat Sci Eng a-Struct, 523, 85-92

21. Yokozeki T, Iwahori Y, Ishibashi M, Yanagisawa T, Imai K, Arai M, Takahashi T, Enomoto K (2009), Compos Sci Technol, 69, 2268-2273

22. Karapappas P, Vavouliotis A, Tsotra P, Kostopoulos V, Paipetis A (2009), J Compos Mater, 43, 977-985

23. Mirjalili V, Ramachandramoorthy R, Hubert P (2014), Carbon, 79, 413-423

24. Ashrafi B, Guan JW, Mirjalili V, Zhang YF, Chun L, Hubert P, Simard B, Kingston CT, Bourne O, Johnston A (2011), Compos Sci Technol, 71, 1569-1578

25. Borowski E, Soliman E, Kandil UF, Taha MR (2015), Polymers-Basel, 7, 1020-1045

26. Godara A, Mezzo L, Luizi F, Warrier A, Lomov SV, van Vuure AW, Gorbatikh L, Moldenaers P, Verpoest I (2009), Carbon, 47, 2914-2923

27. Menbari S, Ashori A, Rahmani H, Bahrami R (2016), Polym Test, 54, 186-195

28. Hawkins DA, Haque A (2015), 6th BSME International Conference on Thermal Engineering, 105, 829-834

29. Ahmadi-Moghadam B, Taheri F (2015), Engineering Fracture Mechanics, 143, 97-107

30. Arca M, Coker D. Experimental investigation of CNT effect on curved beam strength and interlaminar fracture toughness of CFRP laminates. Journal of Physics: Conference Series.

31. Romhany G, Szebenyi G (2009), Express Polym Lett, 3, 145-151

32. Inam F, Wong DW, Kuwata M, Peijs T (2010), Journal of Nanomaterials, 2010, 9

33. Becker O, Varley RJ, Simon GP (2003), J Mater Sci Lett, 22, 1411-1414

34. Siddiqui NA, Woo RSC, Kim JK, Leung CCK, Munir A (2007), Compos Part a-Appl S, 38, 449-460

35. Xu Y, Van Hoa S (2008), Compos Sci Technol, 68, 854-861

36. Liu W, Hoa SV, Pugh M (2005), Compos Sci Technol, 65, 2364-2373

37. Subramaniyan AK, Sun C (2008), J Compos Mater, 42, 2111-2122

38. Quaresimin M, Varley RJ (2008), Compos Sci Technol, 68, 718-726

39. Phonthammachai N, Li X, Wong S, Chia HL, Tjiu WW, He CB (2011), Compos Part a-Appl S, 42, 881-887

40. Ning HM, Li JH, Hu N, Yan C, Liu YL, Wu LK, Liu F, Zhang JY (2015), Carbon, 91, 224-233

41. Ning HM, Li Y, Li JH, Hu N, Liu YL, Wu LK, Liu F (2015), Compos Part a-Appl S, 68, 226-234

42. Kamar NT, Hossain MM, Khomenko A, Haq M, Drzal LT, Loos A (2015), Compos Part a-Appl S, 70, 82-92

43. Li Y, Hori N, Arai M, Hu N, Liu YL, Fukunaga H (2009), Compos Part a-Appl S, 40, 2004-2012

44. Thakre PR, Lagoudas DC, Riddick JC, Gates TS, Frankland S-JV, Ratcliffe JG, Zhu J, Barrera EV (2011), J Compos Mater, 45, 1091-1107

45. Almuhammadi K, Alfano M, Yang Y, Lubineau G (2014), Mater Design, 53, 921-927

46. Joshi SC, Dikshit V (2012), J Compos Mater, 46, 665-675

47. Shan F, Gu Y, Li M, Liu Y, Zhang Z (2013), Polym Composite, 34, 41-50

48. Rodríguez-González J, Rubio-González C, Meneses-Nochebuena C, González-García P, Licea-Jiménez L (2017), Composite Interfaces, 24, 883-896

49. Chaudhry M, Czekanski A, Zhu Z (2017), International Journal of Mechanical Sciences, 131, 480-489
